# Supplementary material for: A hybrid inorganic–organic light-emitting diode using Ti-doped ZrO2 as an electron-injection layer
Source: Royal Society of Chemistry journal article supplement (doi:10.1039/c8ra00259b), 2018-01-01

### Supporting information

## **A Hybrid Inorganic–Organic Light-Emitting Diode using Ti-doped ZrO<sub>2</sub> as an Electron-Injection Layer**

**Jayaraman Jayabharathi\*, Sekar Panimozhi, Venugopal Thanikachalam, Annadurai Prabhakaran and Palanivel Jeeva**

*Department of Chemistry, Annamalai University, Annamalainagar 608 002, Tamilnadu, India.*

\* Address for correspondence

Dr. J. Jayabharathi  
Professor of Chemistry  
Department of Chemistry  
Annamalai University  
Annamalai nagar 608 002  
Tamilnadu, India.  
Tel: +91 9443940735  
E-mail: [jtchalam2005@yahoo.co.in](mailto:jtchalam2005@yahoo.co.in)

## Contents

**1. Table S1**

**2. Figures S1-S4**

**Table S1:** Summary of device performances 1-4 and other recently reported green emitting devices

| <b>Electron injection materials</b> | <b>L (cd/m<sup>2</sup>)</b> | <b>V (V)</b> | <b><math>\eta_c</math> (cd A<sup>-1</sup>)</b> | <b><math>\eta_p</math> (lm W<sup>-1</sup>)</b> | <b>Reference</b> |
|-------------------------------------|-----------------------------|--------------|------------------------------------------------|------------------------------------------------|------------------|
| ZnO /F8BT                           | 8600                        | 6.0          | 1.5                                            | -                                              | 19               |
| TiO <sub>2</sub> /F8BT              | 805                         | 10.6         | 0.03                                           | -                                              | 30               |
| PE/Al                               | 1964                        | 0.82         | -                                              | -                                              | 69               |
| ZrO <sub>2</sub> /redF              | 3450                        | 11.8         | 0.47                                           | 0.18                                           | 30               |
| ZrO <sub>2</sub> /L-green           | 4560                        | 11.8         | 1.01                                           | 0.41                                           | 30               |
| ZrO <sub>2</sub> /L-Blue            | 470                         | 13.2         | 0.12                                           | 0.03                                           | 30               |
| ZrO <sub>2</sub> / F8BT             | 25970                       | 9.0          | 2.71                                           | 1.02                                           | 30               |
| ZrO <sub>2</sub> /PFO               | 309                         | 9.2          | 0.03                                           | 0.015                                          | 30               |
| PE/Ag                               | 1689                        | 0.80         | -                                              | -                                              | 30               |
| TiO <sub>2</sub> /F8BT              | 805                         | 10.6         | 0.03                                           | 0.01                                           | 30               |
| TiO <sub>2</sub> /redF              | 168                         | 12.4         | 0.01                                           | 0.003                                          | 30               |
| TiO <sub>2</sub> /L-green           | 2.9                         | 10.8         | 0.0002                                         | 0.00007                                        | 30               |
| TiO <sub>2</sub> /L-Blue            | 5.1                         | 14.8         | 0.0007                                         | 0.0002                                         | 30               |
| TiO <sub>2</sub> / F8BT             | 805                         | 10.6         | 0.03                                           | 0.01                                           | 30               |
| TiO <sub>2</sub> /PFO               | 0.1                         | 12.8         | 0.000005                                       | 0.000001                                       | 30               |
| Ti-ZrO <sub>2</sub> (1%)            | 24230                       | 8.6          | 1.93                                           | 1.03                                           | This work        |
| Ti-ZrO <sub>2</sub> (2%)            | 24948                       | 7.2          | 2.84                                           | 1.32                                           | This work        |
| Ti-ZrO <sub>2</sub> (3%)            | 26432                       | 7.0          | 2.04                                           | 1.15                                           | This work        |
| Ti-ZrO <sub>2</sub> (4%)            | 26996                       | 6.5          | 2.41                                           | 1.23                                           | This work        |

## Reference

- [19] M. Takada, S. Furuta, T. Kobayashi, T. Nagase, T. Shinagawa, M. Izaki and H. Naito, *J. Appl. Phys.* 2016, **120**, 185501-6.
- [30] N. Tokmoldin, N. Griffiths, Donal D. C. Bradley and Saif A. Haque, *Adv. Mater.* 2009, **21**, 3475-3478.
- [69] S. Stolz, Y. Zhang, U. Lemmer, G. H. Sosa and H. Aziz, *ACS Appl. Mater. Interfaces.* 2017, **9**, 2776-2785.

Figure S1. <sup>1</sup>H NMR spectrum of 5-(1-(naphthalene-1-yl)-1H-phenanthro[9,10-d]imidazole-2-yl) benzene-1,2,3-triol (NPIBT)

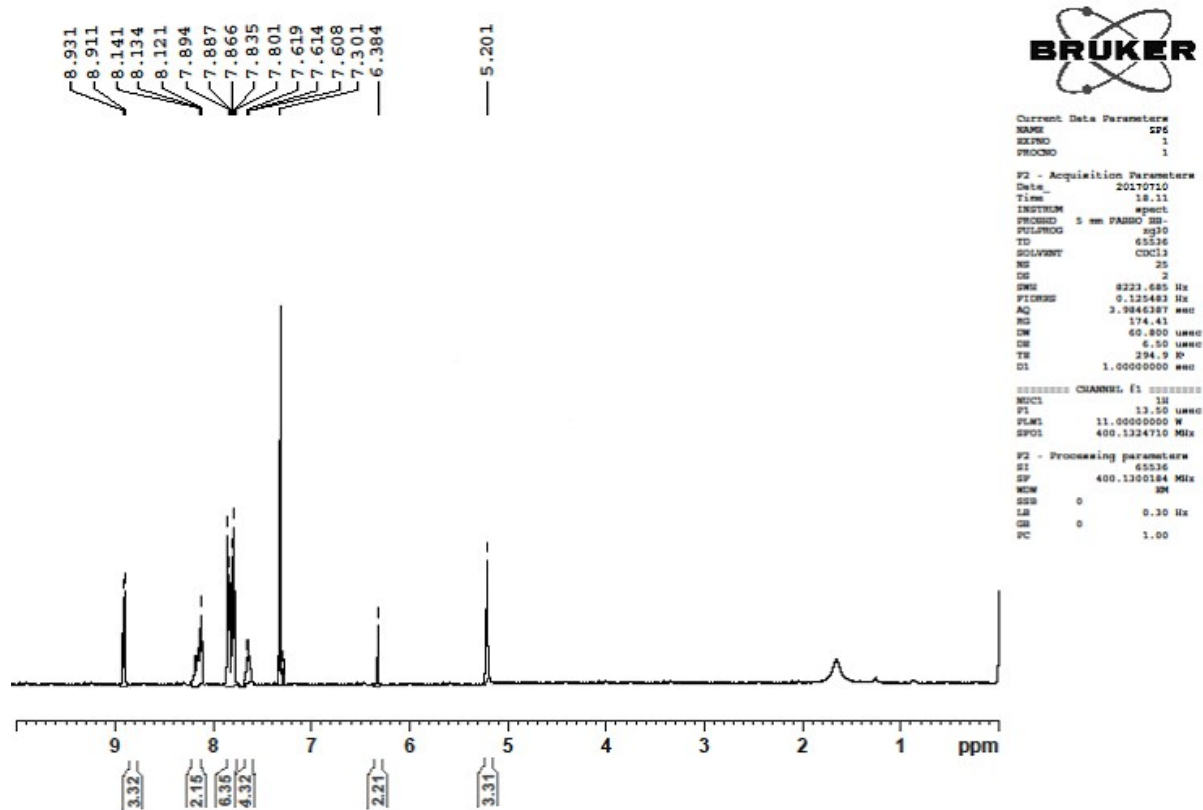

Figure S2. <sup>13</sup>C NMR spectrum of 5-(1-(naphthalene-1-yl)-1H-phenanthro[9,10-d]imidazole-2-yl) benzene-1,2,3-triol (NPIBT)

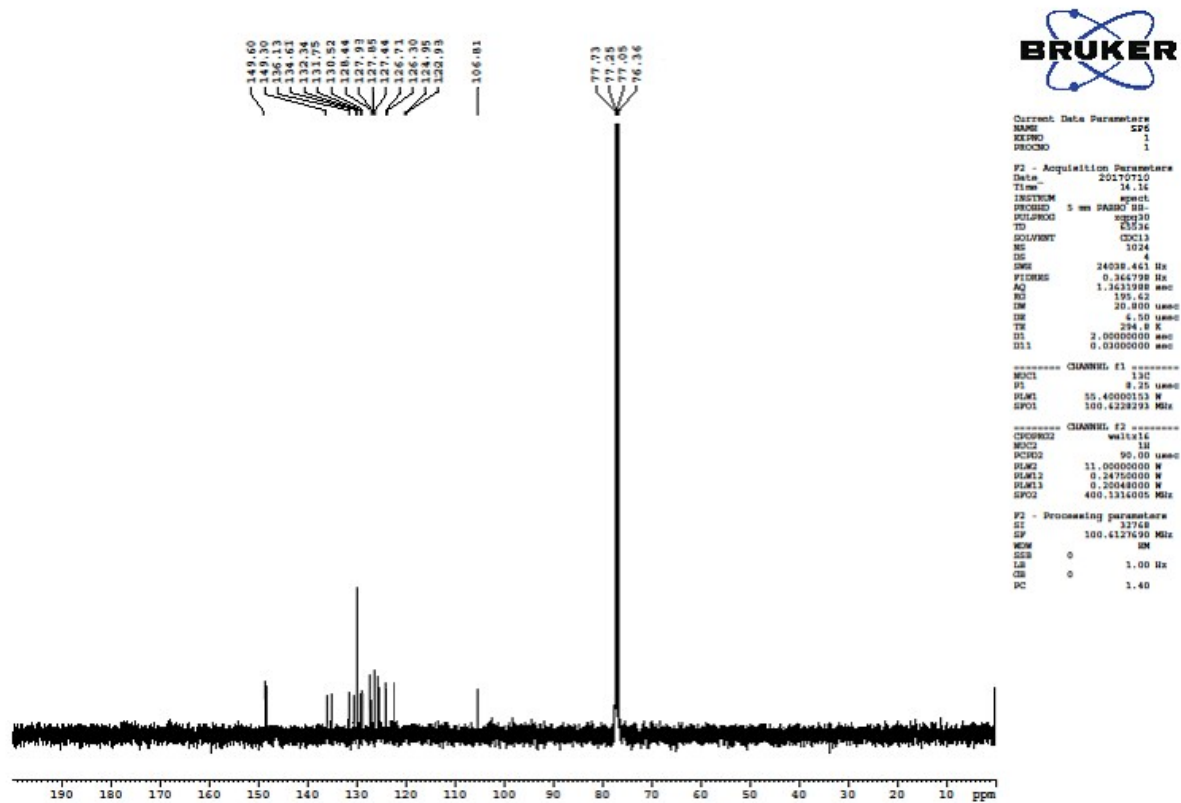

Figure S3. <sup>1</sup>H NMR spectrum of iridium(III)-bis-5-(1-(naphthalene-1-yl)-1H-phenanthro[9,10-d]imidazole-2-yl) benzene-1,2,3-triol (acetylacetonate) [Ir(NPIBT)<sub>2</sub>(acac)]

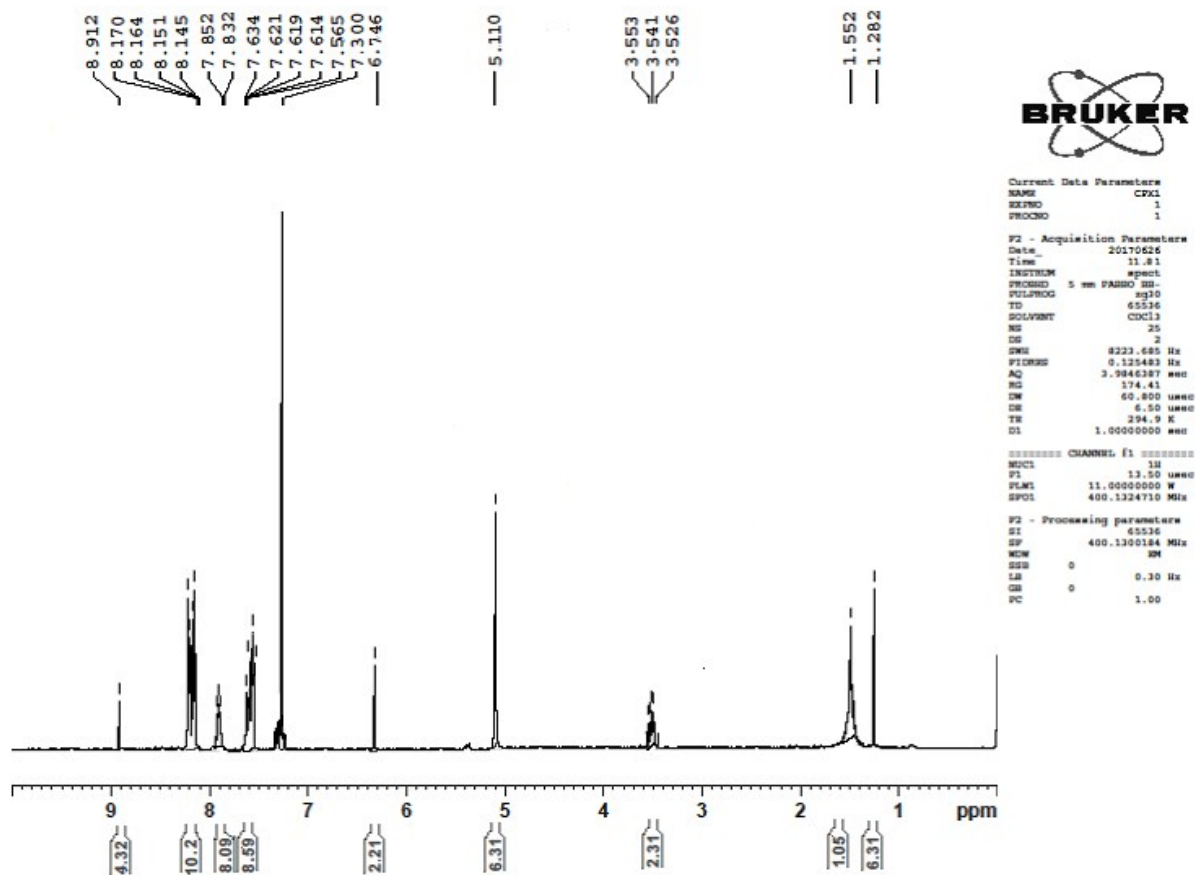

Figure S4. <sup>13</sup>C NMR spectrum of iridium(III)-bis-5-(1-(naphthalene-1-yl)-1H-phenanthro[9,10-d]imidazole-2-yl) benzene-1,2,3-triol (acetylacetonate) [Ir(NPIBT)<sub>2</sub>(acac)]

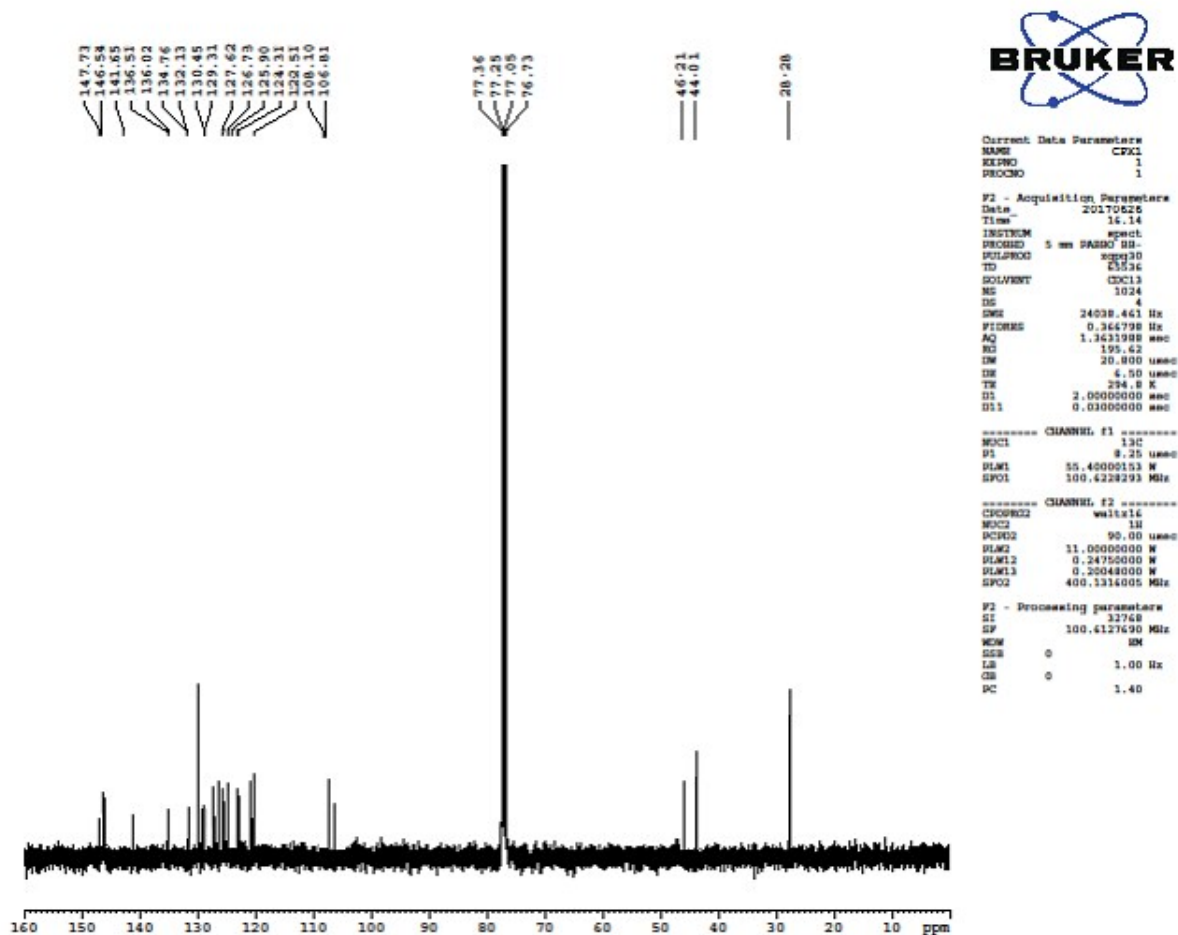

Supplement: c8ra00259b1.pdf [file c8ra00259b1.pdf]
